# Supplementary material for: Photophysics and reverse saturable absorption of cationic dinuclear iridium(iii) complexes bearing fluorenyl-tethered 2-(quinolin-2-yl)quinoxaline ligands
Source: Royal Society of Chemistry journal article supplement (doi:10.1039/d1dt02176a), 2021-01-01
Supplement: d1dt02176a1.pdf [file d1dt02176a1.pdf]

**Photophysics and Reverse Saturable Absorption of Cationic Dinuclear  
Iridium(III) Complexes Bearing Fluorenyl-Tethered  
2-(Quinolin-2-yl)quinoxaline Ligand**

Cuifen Lu,<sup>a,b,‡</sup> Taotao Lu,<sup>a,‡</sup> Peng Cui,<sup>c,a,d</sup> Svetlana Kilina,<sup>a</sup> Wenfang Sun<sup>a,\*</sup>

<sup>a</sup>Department of Chemistry and Biochemistry, North Dakota State University, Fargo, ND  
58108-6050, USA

<sup>b</sup>Hubei Collaborative Innovation Center for Advanced Organochemical Materials &  
Ministry-of-Education Key Laboratory for the Synthesis and Application of Organic  
Functional Molecules, Hubei University, Wuhan, 430062, P.R. China

<sup>c</sup>Key Laboratory of Eco-textiles, Ministry of Education, Jiangnan University, Wuxi, Jiangsu  
Province 214122, P. R. China

<sup>d</sup>Materials and Nanotechnology Program, North Dakota State University, Fargo, ND  
58108-6050, USA

<sup>‡</sup> These two authors contributed equally to this project.

\* Corresponding author. E-mail: Wenfang.Sun@ndsu.edu



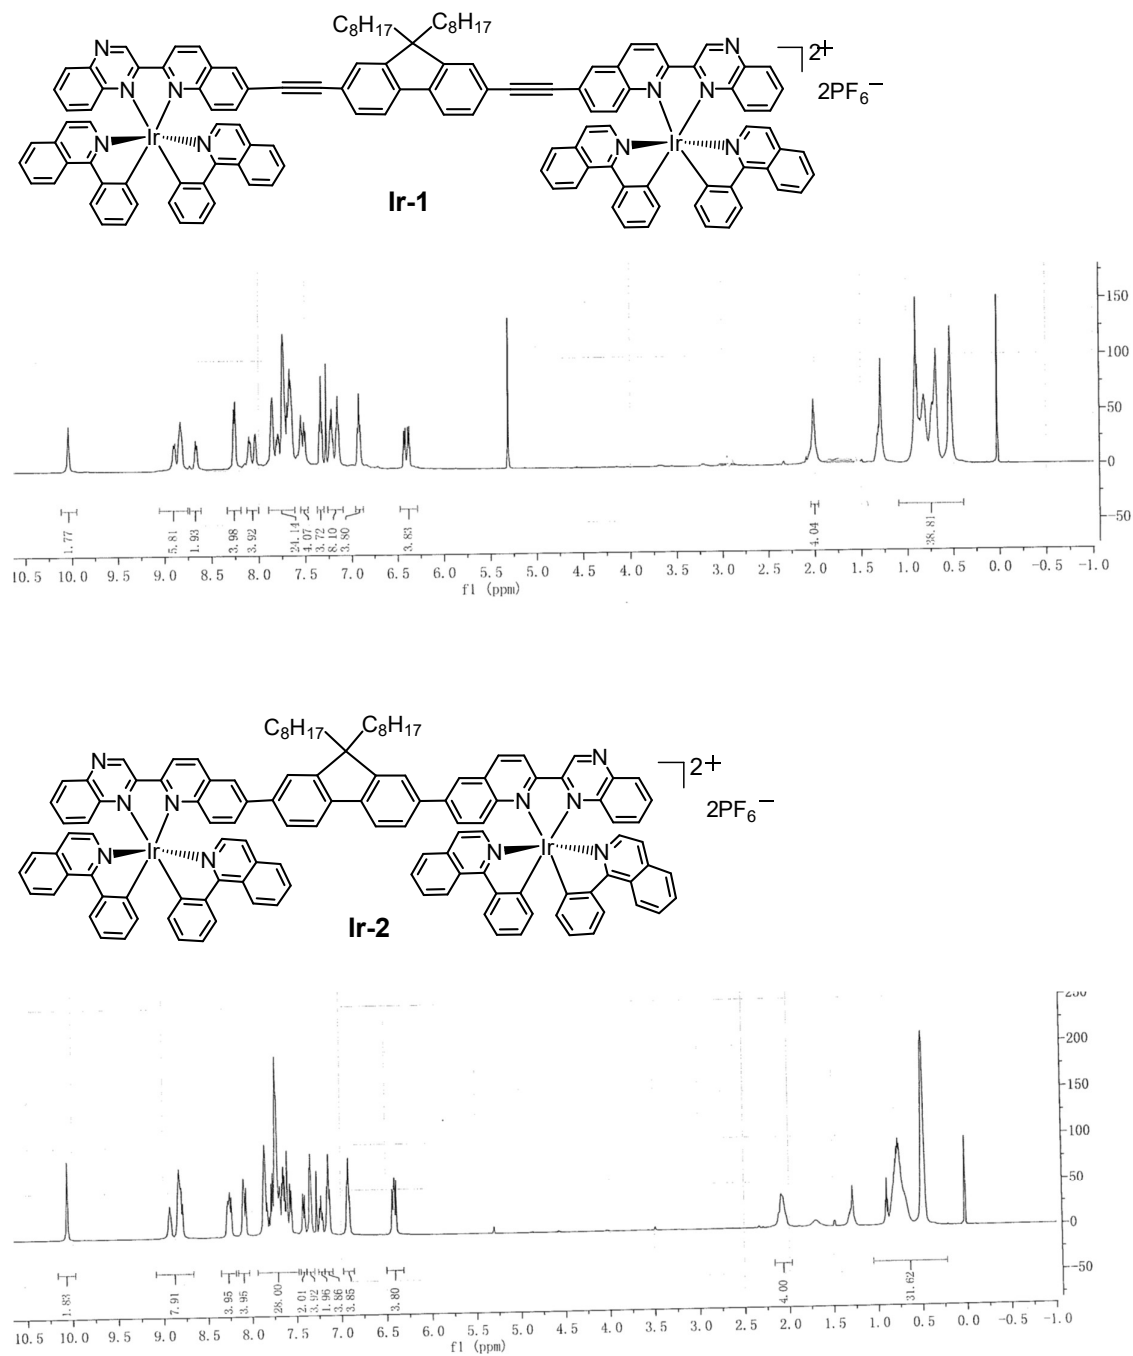

**Figure S1.** <sup>1</sup>H-NMR spectra of compound **4**, ligands **L-1** and **L-2**, and Ir(III) complexes **Ir-1** and **Ir-2** in CDCl<sub>3</sub>.

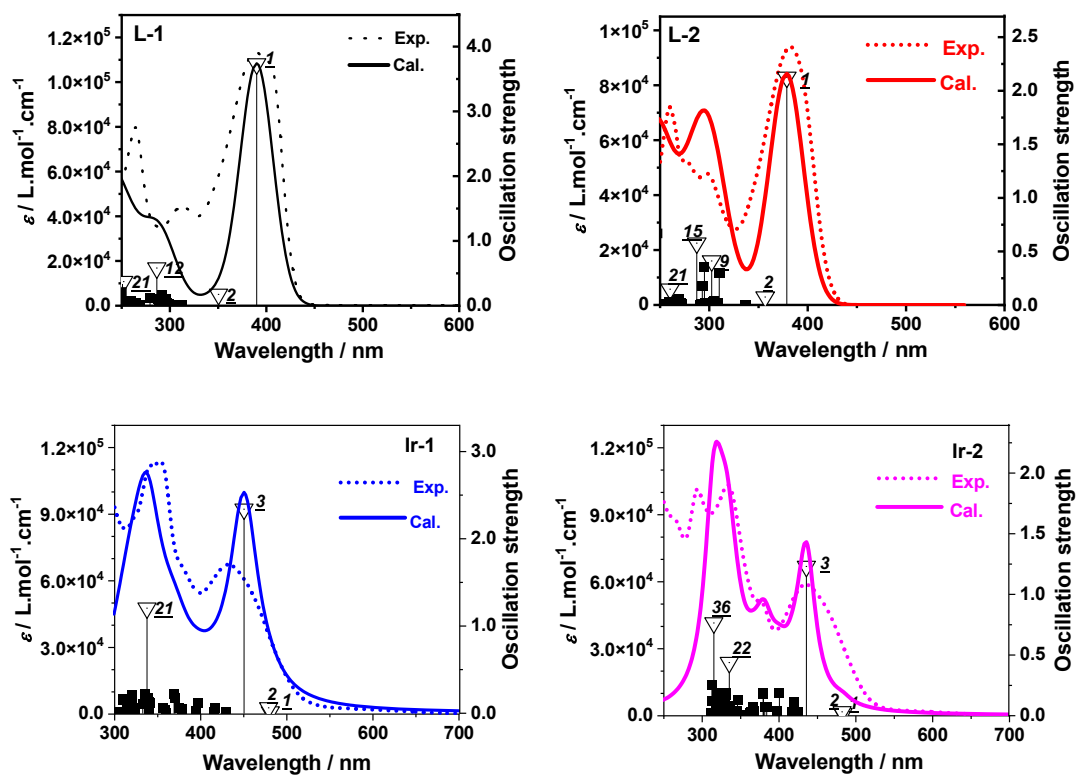

**Figure S2.** Comparison of the experimental and calculated absorption spectra for **L-1** and **L-2** in  $\text{CH}_2\text{Cl}_2$ , and **Ir-1** and **Ir-2** in  $\text{CH}_3\text{CN}$ . Calculations were performed with linear response TDDFT with PBE1 functional and LANL2DZ/6-31G\* basis sets. Vertical line indicates the oscillation strength of the first 70 transitions.

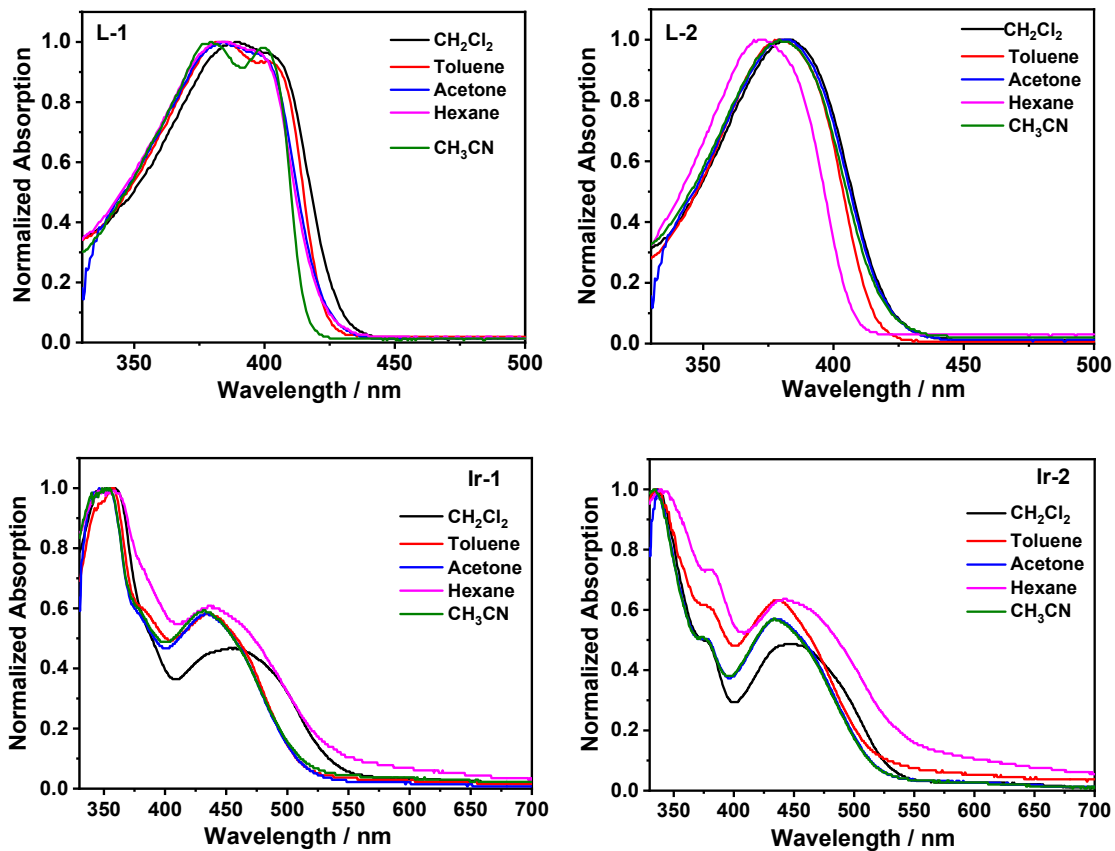

**Figure S3.** Normalized UV-vis absorption spectra of L-1, L-2, Ir-1, and Ir-2 in different solvents.

**Table S1.** Natural transition orbitals (NTOs) representing the main transitions contributing to the high-energy absorption bands for **L-1** and **L-2** in CH<sub>2</sub>Cl<sub>2</sub> and **Ir-1** and **Ir-2** in CH<sub>3</sub>CN.

|                                             | States                                      | Hole                                       | Electron |
|---------------------------------------------|---------------------------------------------|--------------------------------------------|----------|
| <b>L-1</b>                                  | S <sub>12</sub><br>286 nm<br><i>f</i> =0.58 | <br>53%                                    | <br>53%  |
|                                             |                                             | <br>35%                                    | <br>35%  |
|                                             | S <sub>21</sub><br>252 nm<br><i>f</i> =0.37 | <br>56%                                    | <br>56%  |
|                                             |                                             | <br>15%                                    | <br>15%  |
|                                             |                                             |                                            |          |
|                                             | <b>L-2</b>                                  | S <sub>9</sub><br>303 nm<br><i>f</i> =0.41 | <br>48%  |
| <br>41%                                     |                                             |                                            | <br>41%  |
| S <sub>15</sub><br>288 nm<br><i>f</i> =0.58 |                                             | <br>58%                                    | <br>58%  |
|                                             |                                             | <br>22%                                    | <br>22%  |
|                                             |                                             | <br>12%                                    | <br>12%  |
| S <sub>21</sub><br>261 nm<br><i>f</i> =0.15 |                                             | <br>43%                                    | <br>43%  |
|                                             | <br>29%                                     | <br>29%                                    |          |
| <b>Ir-1</b>                                 | S <sub>21</sub><br>338 nm<br><i>f</i> =1.20 | <br>68%                                    | <br>68%  |
|                                             |                                             | <br>25%                                    | <br>25%  |
|                                             |                                             |                                            |          |
| <b>Ir-2</b>                                 | S <sub>22</sub><br>336 nm<br><i>f</i> =0.43 | <br>70%                                    | <br>70%  |
|                                             |                                             | <br>11%                                    | <br>11%  |

---

$S_{36}$   
316 nm  
 $f=0.74$

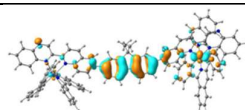

52%

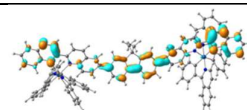

52%

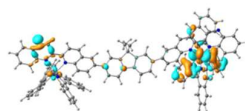

21%

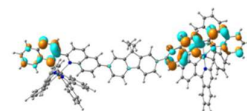

21%

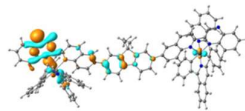

12%

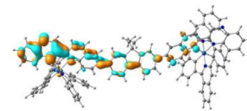

12%

---

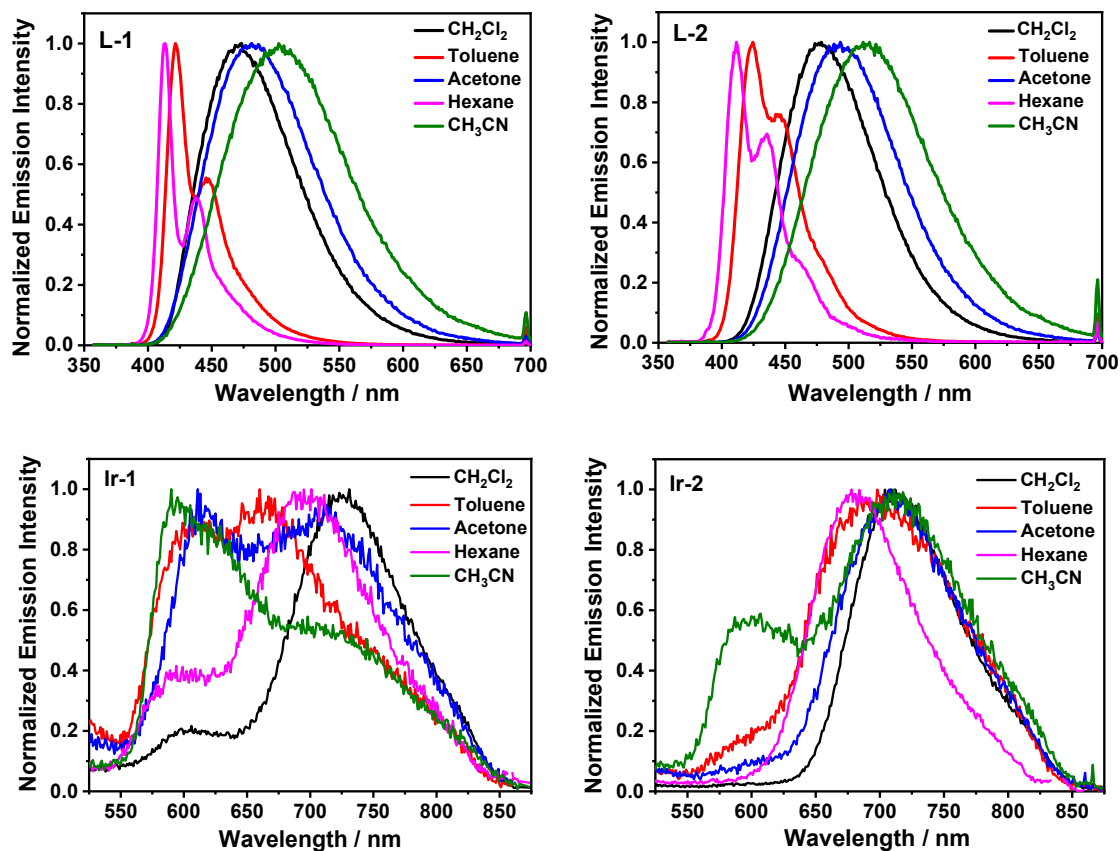

**Figure S4.** Normalized emission spectra of **L-1**, **L-2**, **Ir-1**, and **Ir-2** in different solvents at room temperature.  $\lambda_{\text{ex}} = 347.5$  nm for **L-1** and **L-2**, and  $\lambda_{\text{ex}} = 436$  nm for **Ir-1** and **Ir-2**.



**Table S2.** Emission parameters of **L-1**, **L-2**, **Ir-1**, and **Ir-2** in different solvents at room temperature.

|             | Hexane             | Toluene            | $\lambda_{em}/nm; \Phi_{em}^a$<br>CH <sub>2</sub> Cl <sub>2</sub> | Acetone            | CH <sub>3</sub> CN      |
|-------------|--------------------|--------------------|-------------------------------------------------------------------|--------------------|-------------------------|
| <b>L-1</b>  | 413, 438; 0.36     | 421, 446; 0.52     | 472; 0.67                                                         | 481; 0.60          | 503; 0.43               |
| <b>L-2</b>  | 412, 435; 0.12     | 424, 445; 0.52     | 477; 0.64                                                         | 493; 0.60          | 514; 0.41               |
| <b>Ir-1</b> | 588, 704;<br>0.004 | 610, 668;<br>0.003 | 595, 718;<br>0.004                                                | 618, 715;<br>0.003 | 590, 618, 700;<br>0.003 |
| <b>Ir-2</b> | 705; 0.006         | 707; 0.003         | 710; 0.006                                                        | 714; 0.003         | 588, 716; 0.003         |

<sup>a</sup> Emission band maxima ( $\lambda_{em}$ ) and quantum yields ( $\Phi_{em}$ ) measured in different solvents at room temperature with Ru(bpy)<sub>3</sub>Cl<sub>2</sub> in degassed CH<sub>3</sub>CN ( $\Phi_{em} = 0.097$ ,  $\lambda_{ex} = 436$  nm) as the reference for complexes **Ir-1** and **Ir-2** and a 1 N sulfuric acid solution of quinine bisulfate ( $\Phi_{em} = 0.546$ ,  $\lambda_{ex} = 347.5$  nm) as the reference for ligands **L-1** and **L-2**.

**Table S3.** NTOs representing the fluorescence emitting states for **L-1** and **L-2** in CH<sub>2</sub>Cl<sub>2</sub>.

|            | S <sub>1</sub> | Electron                                                                          | Hole                                                                                |
|------------|----------------|-----------------------------------------------------------------------------------|-------------------------------------------------------------------------------------|
| <b>L-1</b> | 458 nm         |  |  |
| <b>L-2</b> | 492 nm         |  |  |

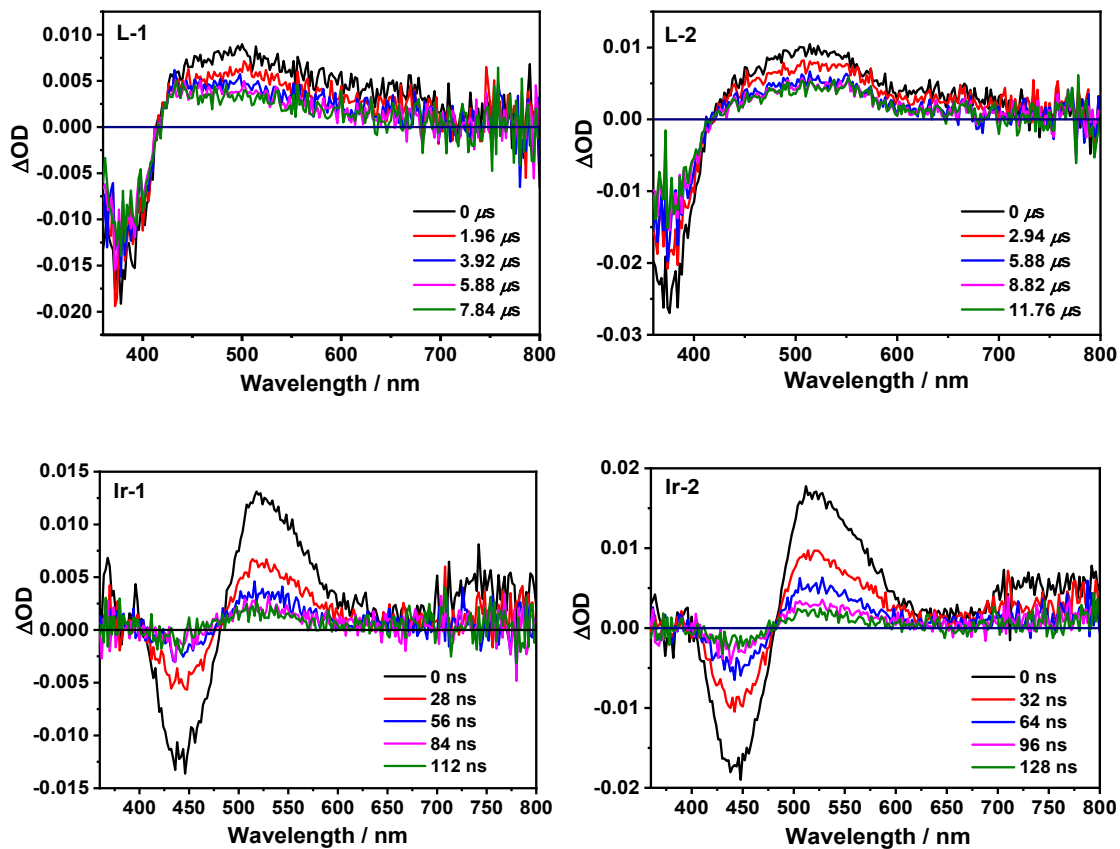

**Figure S5.** Time-resolved nanosecond TA spectra of **L-1** and **L-2** in  $\text{CH}_2\text{Cl}_2$ , and **Ir-1** and **Ir-2** in  $\text{CH}_3\text{CN}$  after 355-nm excitation.  $A_{355} = 0.4$  in a 1-cm cuvette.
